# Supplementary material for: Synthesis of conjugation-ready zwitterionic oligosaccharides by chemoselective thioglycoside activation
Source: Royal Society of Chemistry journal article supplement (doi:10.1039/c3sc53362j), 2014-01-01
Supplement: c3sc53362j3.pdf [file c3sc53362j3.pdf]

## **Synthesis of Conjugation-ready Zwitterionic Oligosaccharides by Chemoselective Thioglycoside Activation**

Supporting Information: Supporting Figures

Benjamin Schumann,<sup>a,b</sup> Rajan Pragani,<sup>a,c</sup> Chakkumkal Anish,<sup>a</sup> Claney L. Pereira<sup>\*,a</sup>  
and Peter H. Seeberger<sup>\*,a,b</sup>

<sup>a</sup>Max Planck Institute of Colloids and Interfaces, 14424 Potsdam, Germany

<sup>b</sup>Freie Universität Berlin, Arnimallee 22, 14195 Berlin, Germany

<sup>c</sup>Present address: National Center for Advancing Translational Sciences,  
National Institutes of Health, 9800 Medical Center Drive, Rockville, MD 20850,  
USA

\*E-Mail addresses:

peter.seeberger@mpikg.mpg.de

clanylebev.pereira@mpikg.mpg.de

A

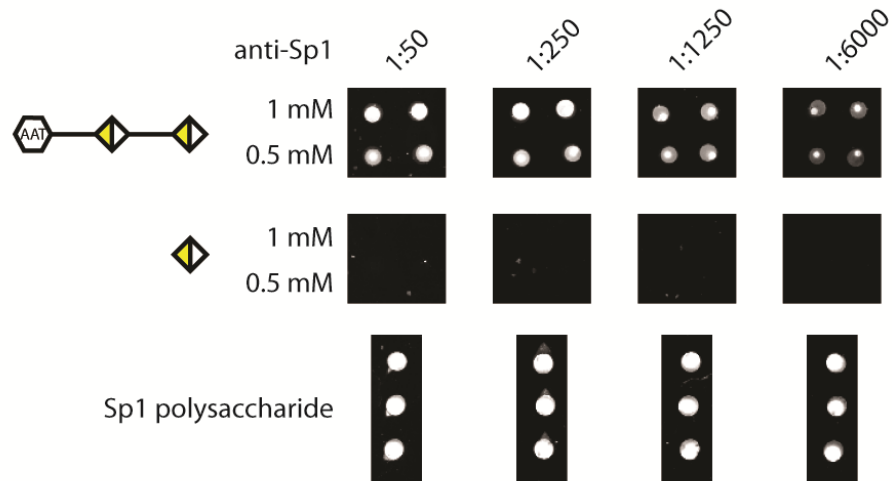

B

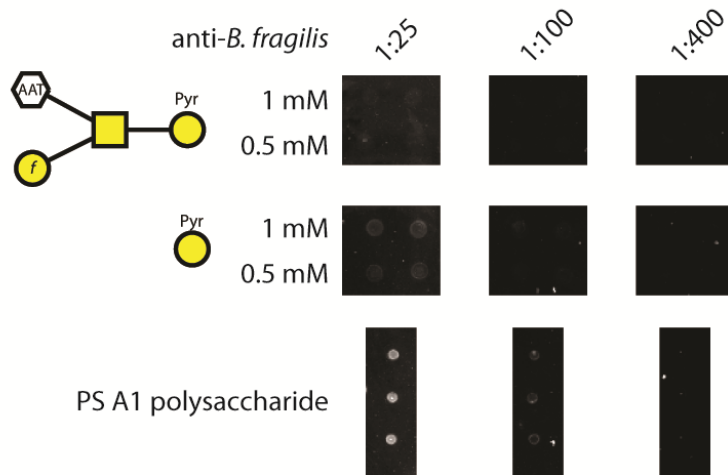

**Figure SI-1.** Binding of antisera to synthetic zwitterionic oligosaccharides and natural ZPSs. Oligosaccharides were immobilized in different concentrations on maleimide-functionalized microarray slides and incubated with increasing dilutions of antisera. Native ZPSs were spotted as positive controls at a concentration of 0.05 mg/mL. *A*, Incubation of synthetic and natural Sp1 structures with rabbit anti-Sp1 antiserum. *B*, Incubation of synthetic and natural PS A1 structures with rabbit anti-*B. fragilis* antiserum. Bound antibodies were detected by incubating with anti-rabbit IgG-FITC secondary antibody.

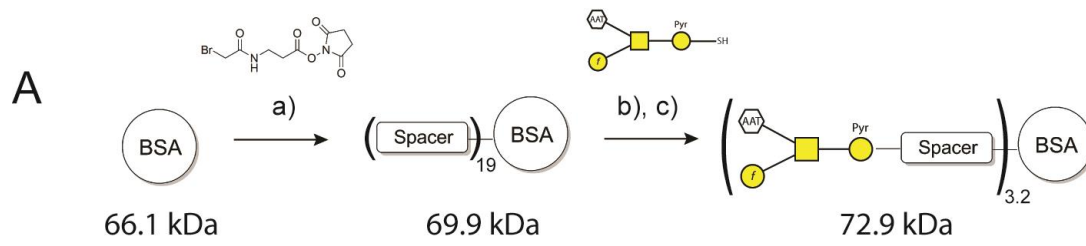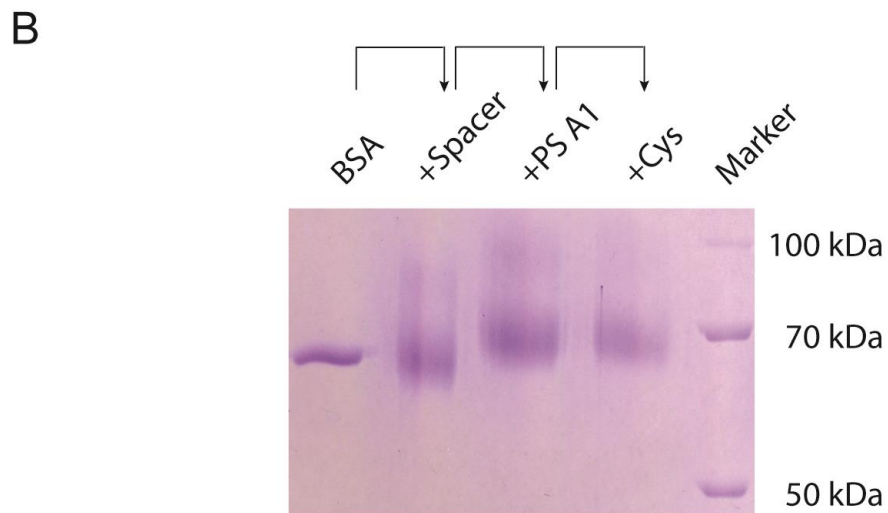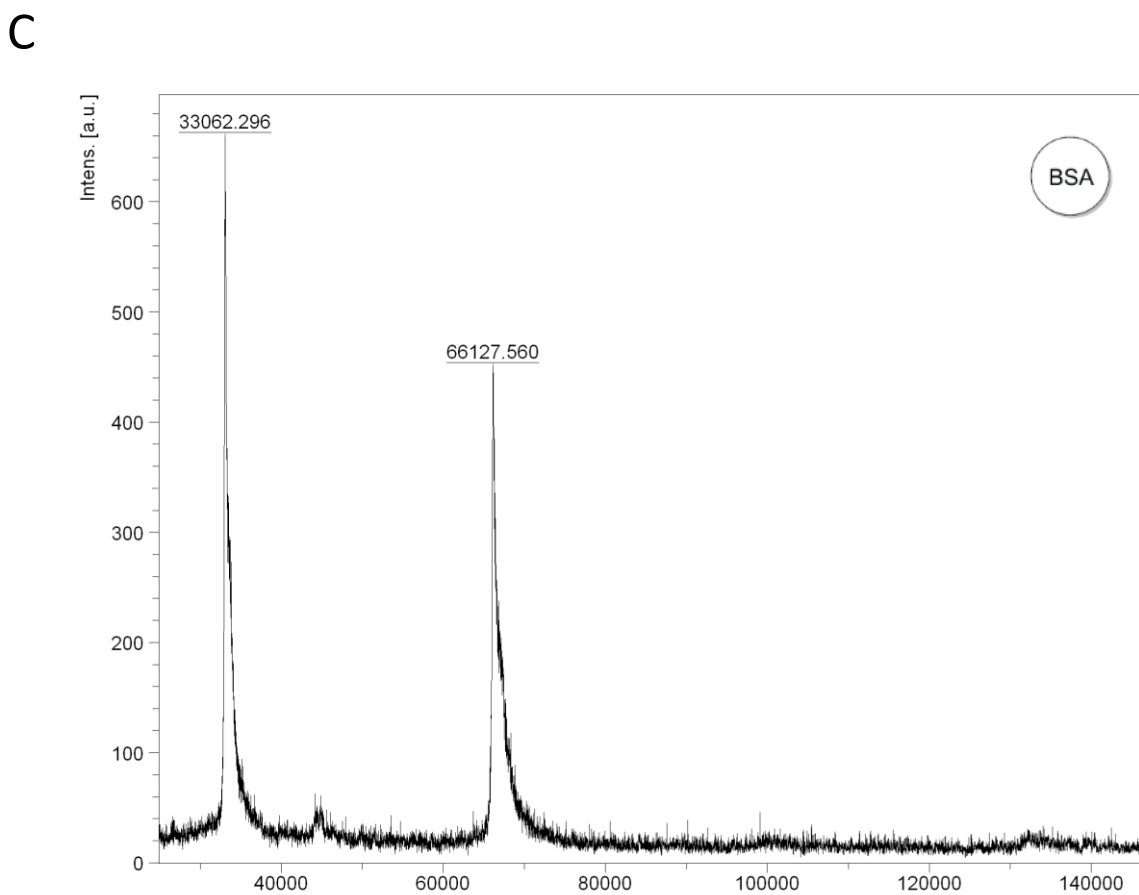

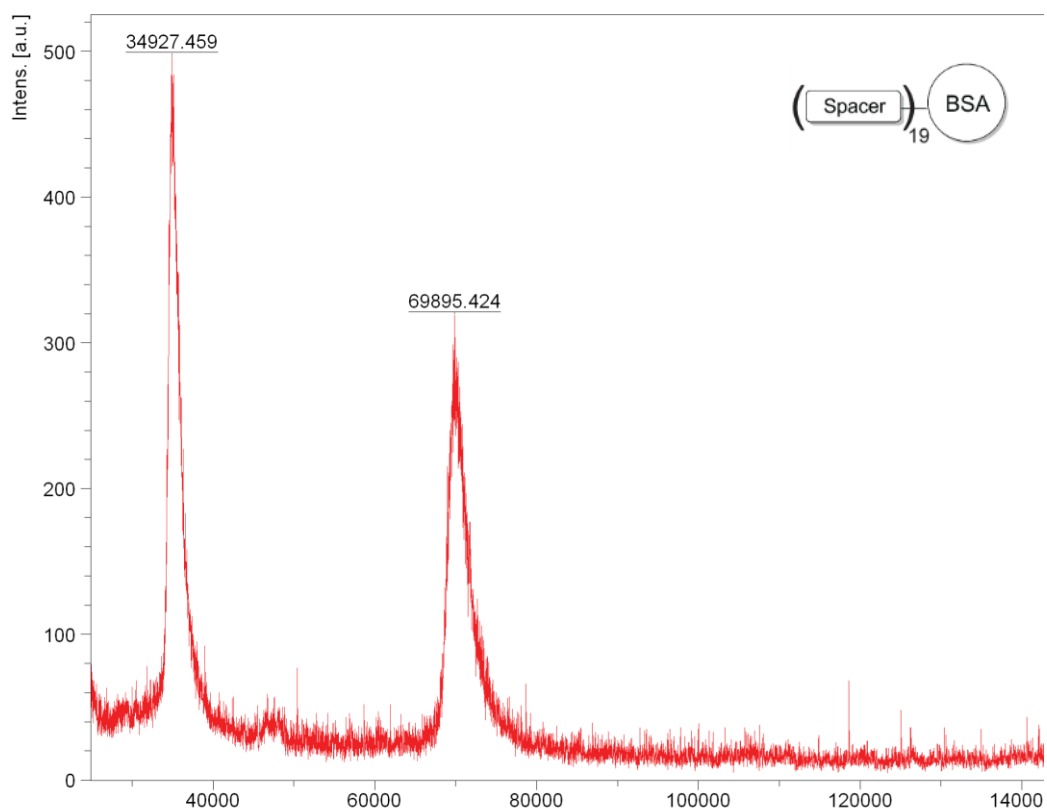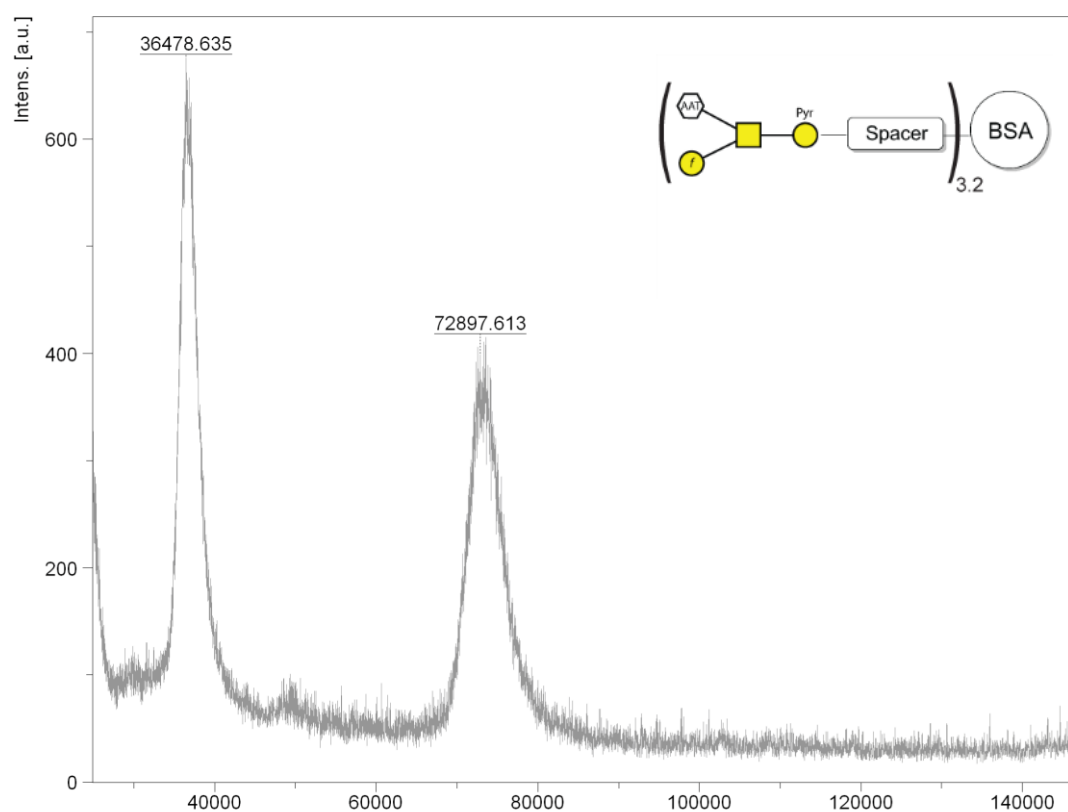

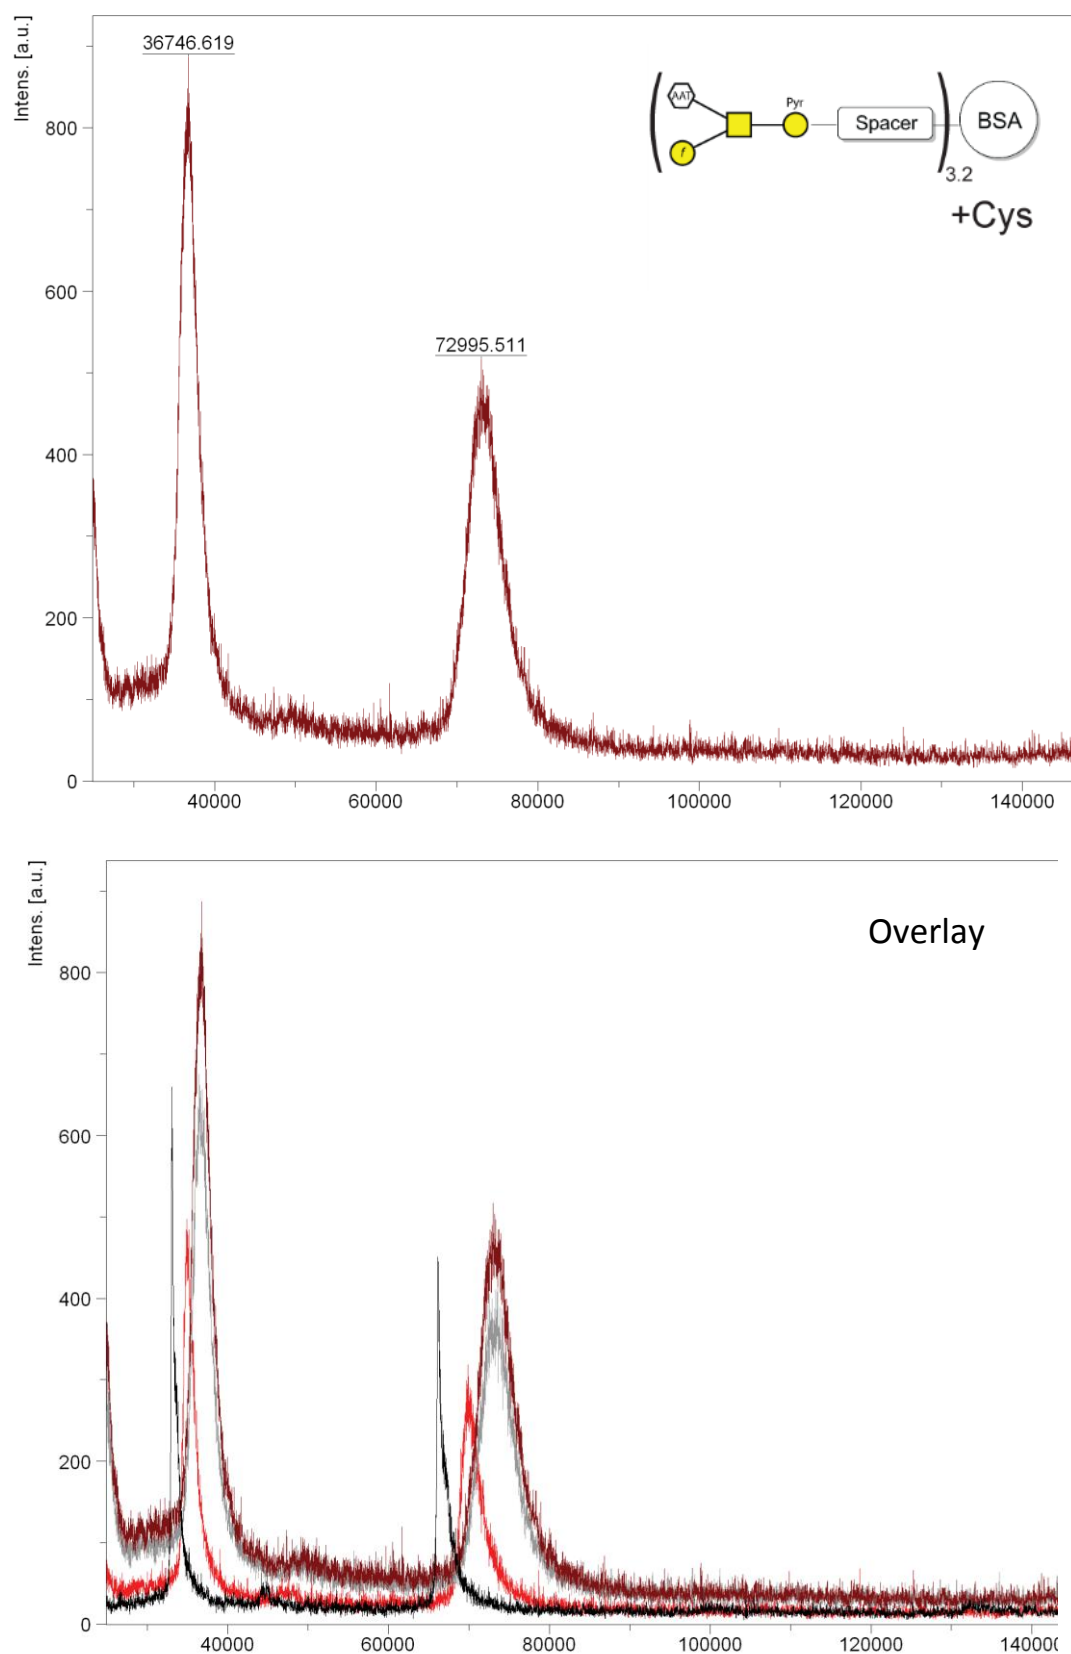

**Figure SI-2.** Preparation of a glycoconjugate of synthetic PS A1 repeating unit **2**. A, schematic representation of the conjugation procedure. a) SBAP, 0.1 M NaPi pH 7.4, r.t.; b) Disulfide **2**, TCEP, 0.1 M NaPi pH 7.4, r.t.; c) L-cysteine, 0.1 M NaPi pH 7.4, r.t. B, 10% SDS-PAGE analysis of glycoconjugation intermediates (Coomassie stain). Marker: PrecisionPlus Unstained Protein Ladder (BioRad, Munich, Germany). C, Analysis of glycoconjugation intermediates by MALDI-TOF-MS. NaPi = sodium phosphate buffer; SBAP = *N*-succinimidyl-3-(bromoacetamido)propionate; TCEP = tris(2-carboxyethyl)phosphine.
